# Supplementary material for: Are there synergies from combining hygiene and sanitation promotion campaigns: Evidence from a large-scale cluster-randomized trial in rural Tanzania
Source: PLoS One. 2017 Nov 1;12(11):e0186228. doi: 10.1371/journal.pone.0186228 (PMC5665426; doi:10.1371/journal.pone.0186228)
Supplement: S2 Table — (XLSX) [file pone.0186228.s002.xlsx]

## Sheet: S2 Table - Program Compliance
S2 Table: Program compliance
	Planned	Lost Wards (Masasi)	Final Assignment	Contamination	Actually treated	Not triggered by CLTS	Didn't receive TSSM DCC	Didn't receive HWWS DCC
Control	48	2	46	-	46	-	-	-
HWWS	47	2	45	-	45	-	-	2
TSSM	47	3	44	-1	43	7	5	-
HWWS + TSSM	48	2	46	+1	47	4	4	3
Notes: no reported problems with (i) mason training or (ii) training of front-line activators (FLAs); no available information for delivery of village-level media (wall drawings, posters, etc.)
